# Supplementary material
Source: PubMed Central journal article supplement (PMC7756905)
Supplement: NIHMS1652169-supplement-SI.pdf [file NIHMS1652169-supplement-SI.pdf]

## Supporting Information

### Binding modes and selectivity of cannabinoid 1 (CB1) and cannabinoid 2 (CB2) receptor ligands

Jing-Fang Yang,<sup>1,2,†</sup> Alexander H. Williams,<sup>1,2,†</sup> Narsimha R. Penthala,<sup>3</sup> Paul L. Prather,<sup>4</sup> Peter A. Crooks,<sup>3</sup> and Chang-Guo Zhan<sup>1,2</sup>

<sup>1</sup>Molecular Modeling and Biopharmaceutical Center and <sup>2</sup>Department of Pharmaceutical Sciences, College of Pharmacy, University of Kentucky, 789 South Limestone Street, Lexington, KY 40536, <sup>3</sup>Department of Pharmaceutical Sciences, College of Pharmacy, University of Arkansas for Medical Sciences, Little Rock, AR 72205, and <sup>4</sup>Department of Pharmacology and Toxicology, College of Medicine, University of Arkansas for Medical Sciences, Little Rock, AR 72205

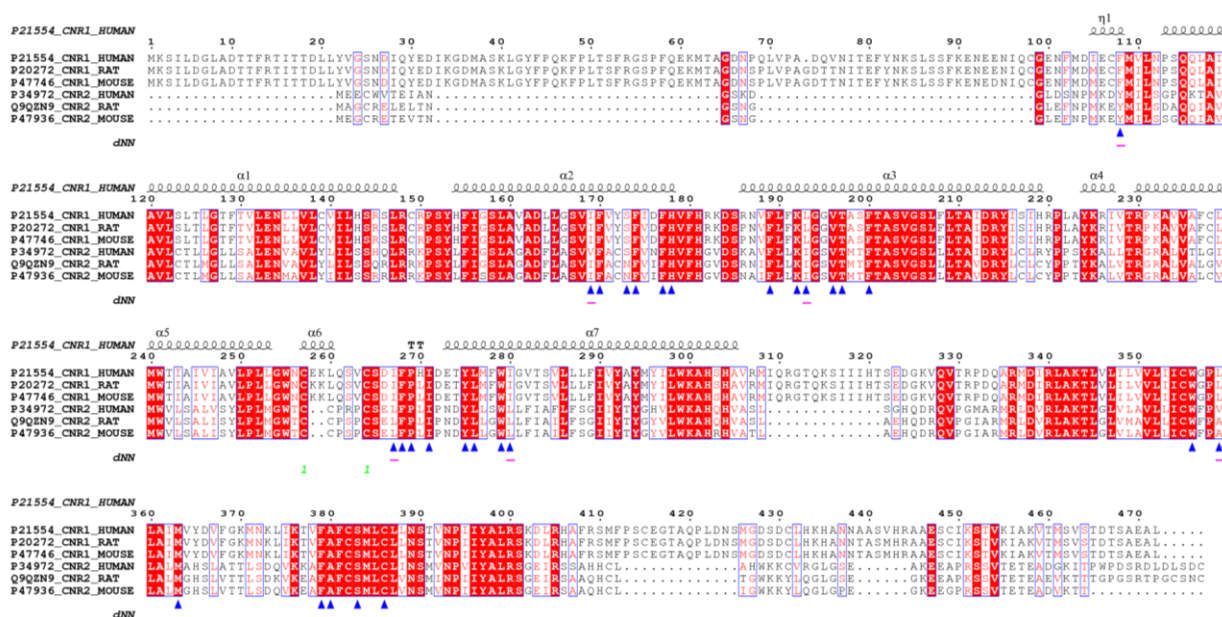

**Figure S1.** The sequence alignment of CB<sub>1</sub>R and CB<sub>2</sub>R. The residues around the ligands in 6 Å distance are labeled with blue triangles. The non-conserved interacting residues are further labeled with pink underlines. Based on the sequence alignment (and the corresponding 3D structures), there is no noticeable difference between different species for a given receptor (CB<sub>1</sub>R or CB<sub>2</sub>R).

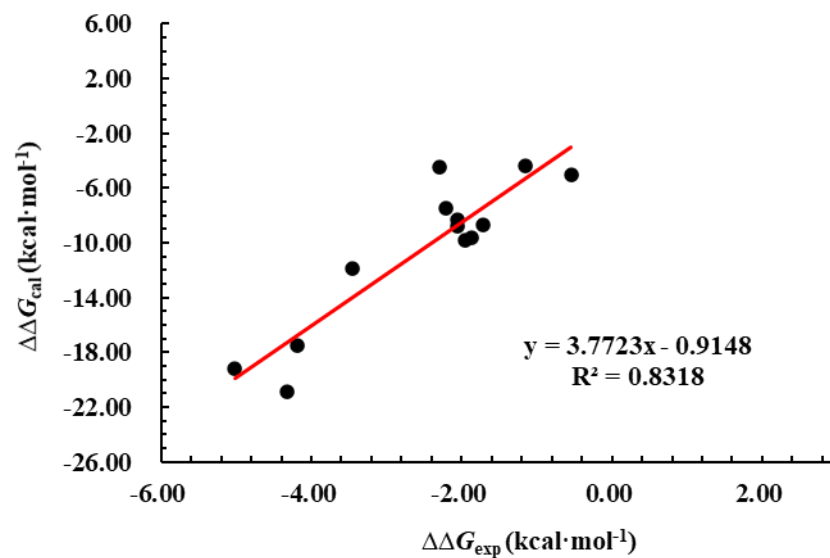

**Figure S2.** Correlation between the computational and experimental binding free energy change of the long-chain molecules.

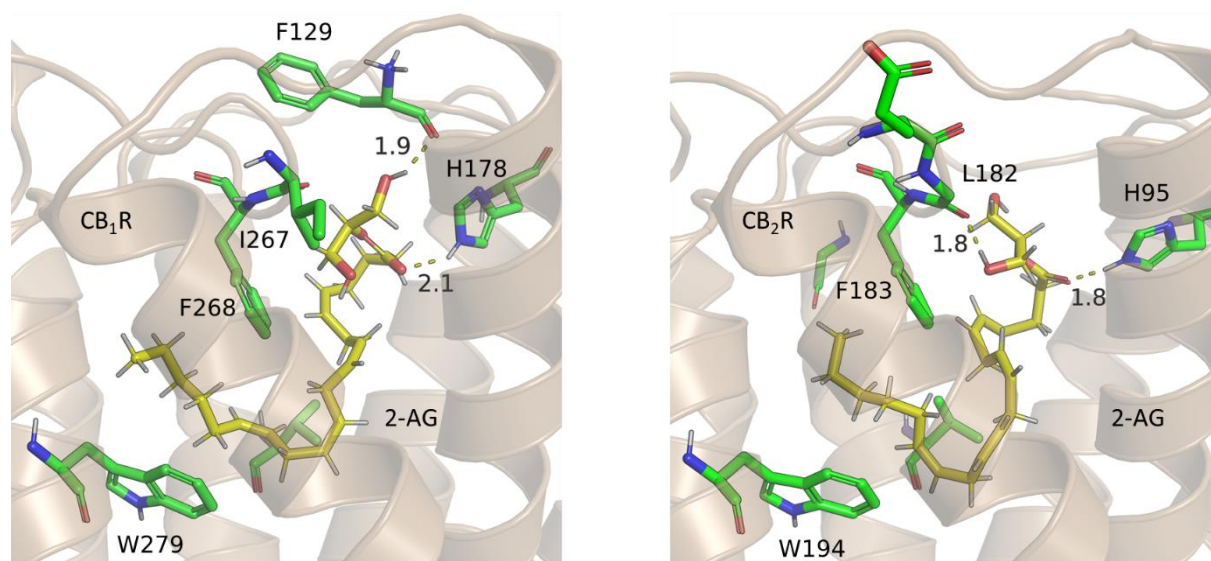

**Figure S3.** Binding modes of the ligand 2-AG with both the CB<sub>1</sub> and CB<sub>2</sub> receptors.

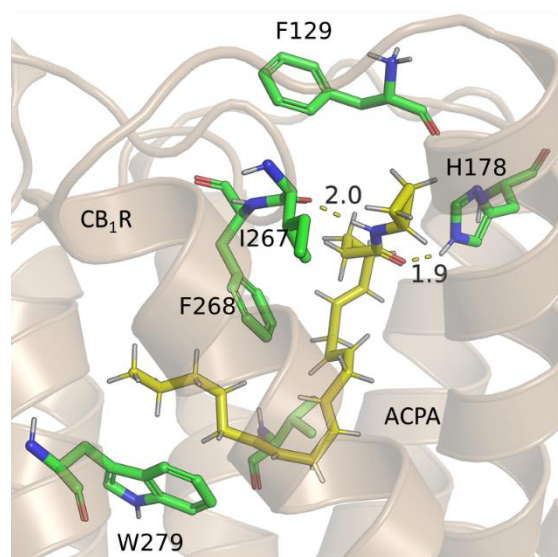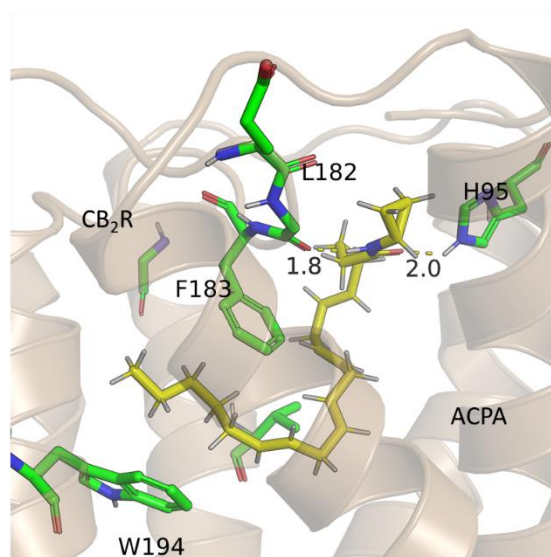

**Figure S4.** Binding modes of the ligand ACPA with both the CB<sub>1</sub> and CB<sub>2</sub> receptors.

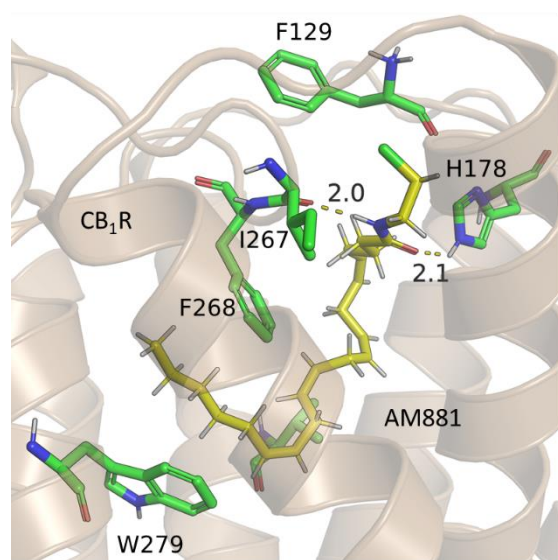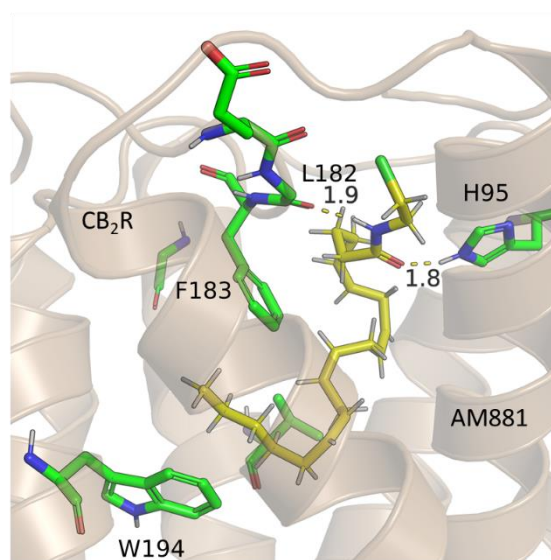

**Figure S5.** Binding modes of the ligand AM881 with both the CB<sub>1</sub> and CB<sub>2</sub> receptors.

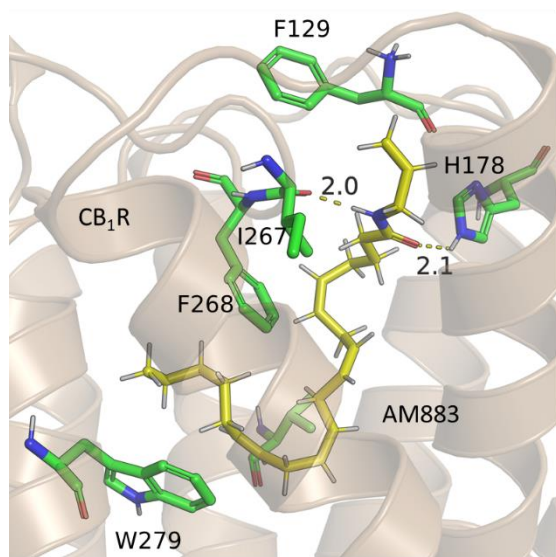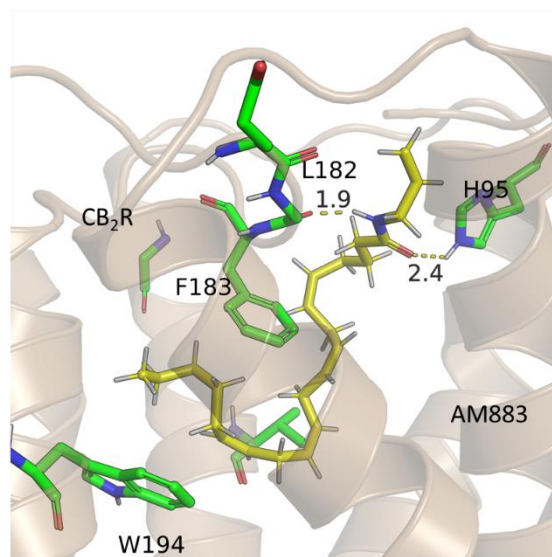

**Figure S6.** Binding modes of the ligand AM883 with both the CB<sub>1</sub> and CB<sub>2</sub> receptors.

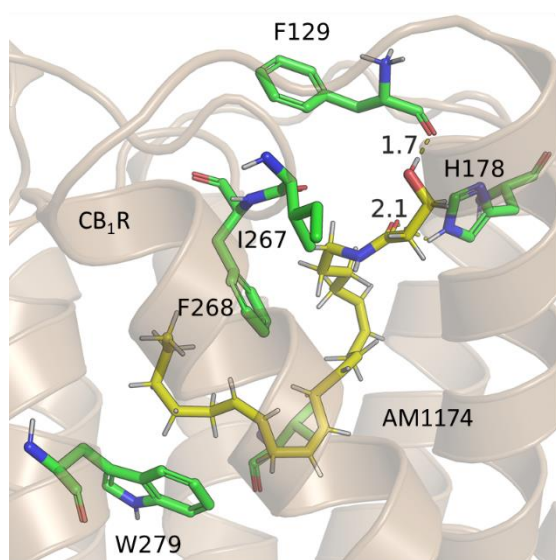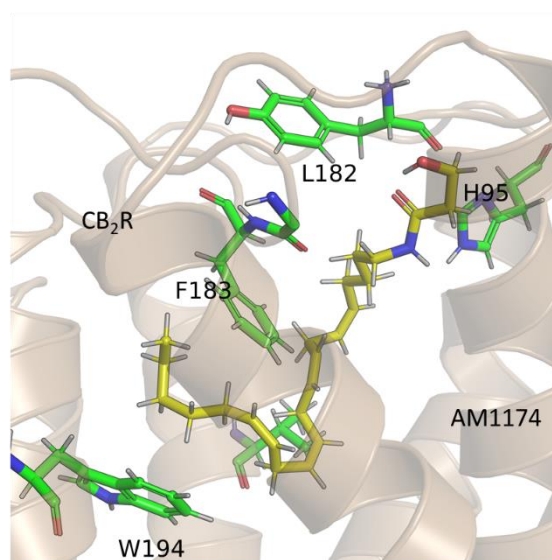

**Figure S7.** Binding modes of the ligand AM1174 with both the CB<sub>1</sub> and CB<sub>2</sub> receptors.

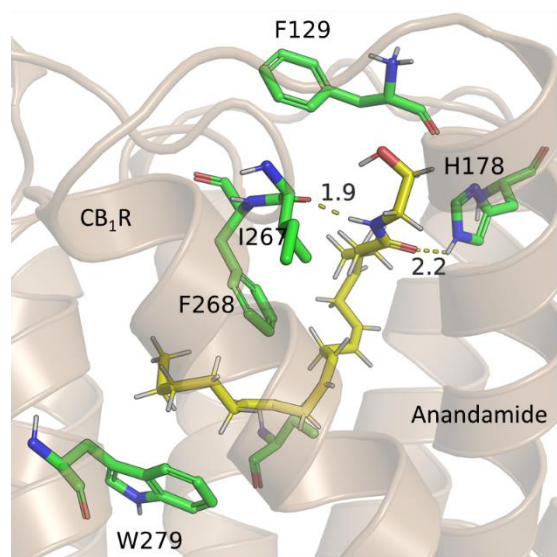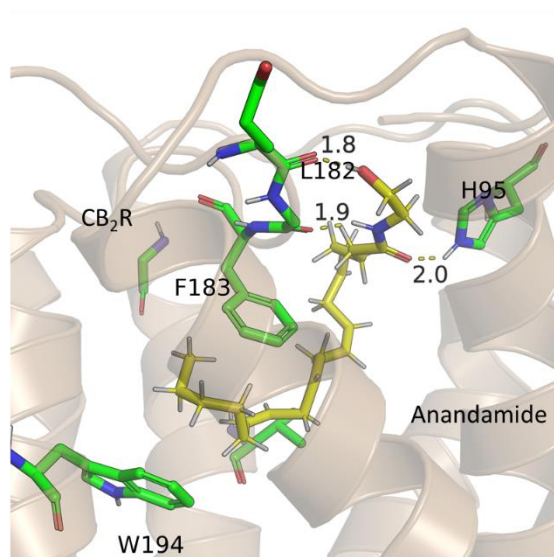

**Figure S8.** Binding modes of the ligand anandamide with both the CB<sub>1</sub> and CB<sub>2</sub> receptors.

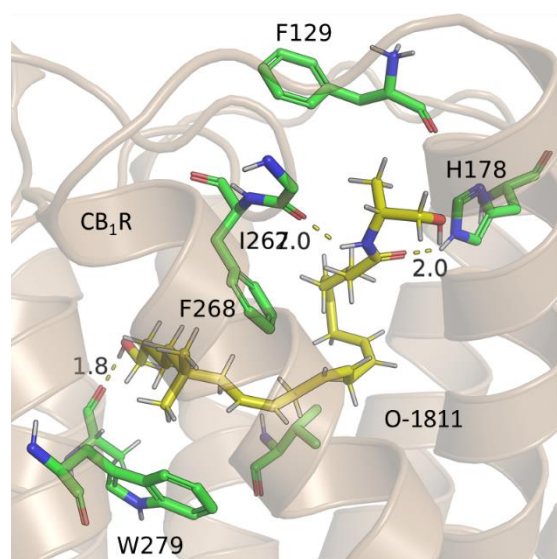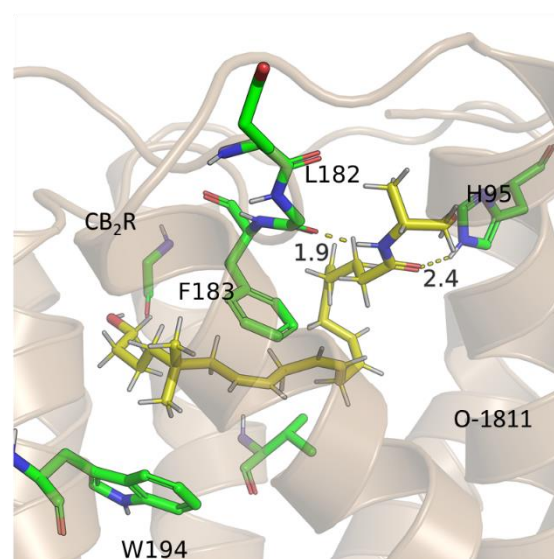

**Figure S9.** Binding modes of the ligand O-1811 with both the CB<sub>1</sub> and CB<sub>2</sub> receptors.

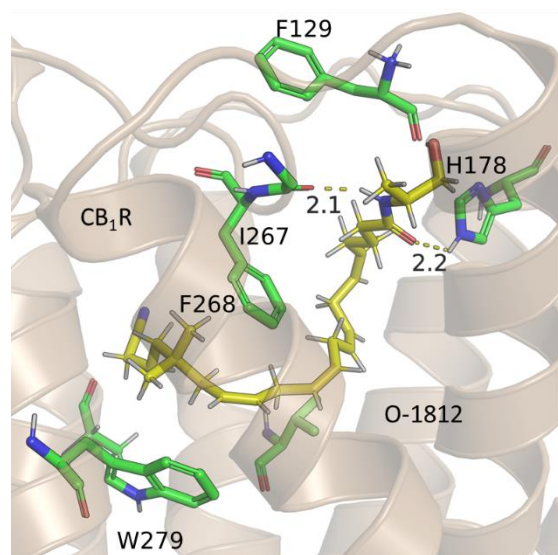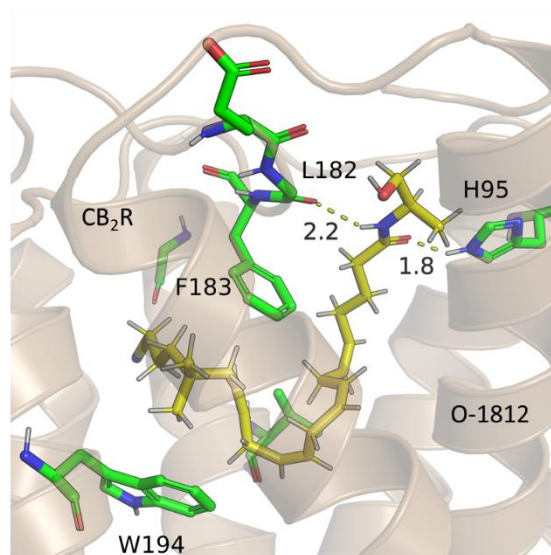

**Figure S10.** Binding modes of the ligand O-1812 with both the CB<sub>1</sub> and CB<sub>2</sub> receptors.

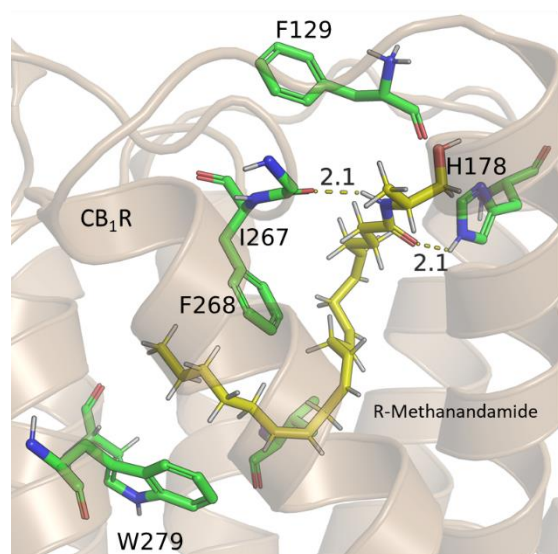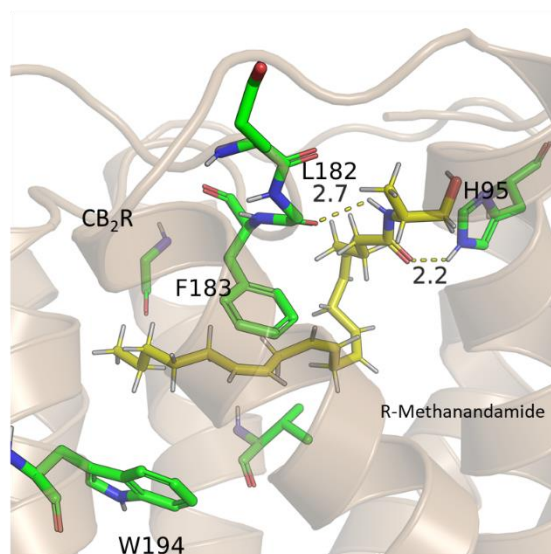

**Figure S11.** Binding modes of the ligand (R)-Methanandamide with both the CB<sub>1</sub> and CB<sub>2</sub> receptors.

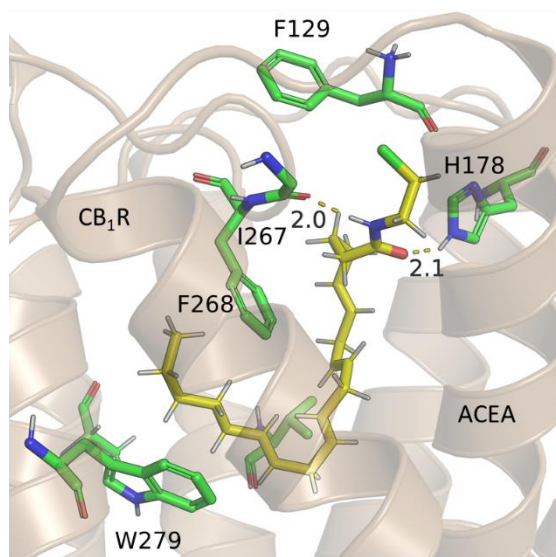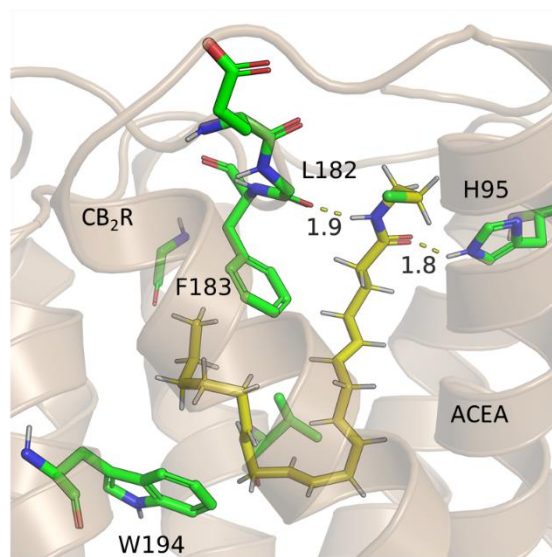

**Figure S12.** Binding modes of the ligand ACEA with both the CB<sub>1</sub> and CB<sub>2</sub> receptors.

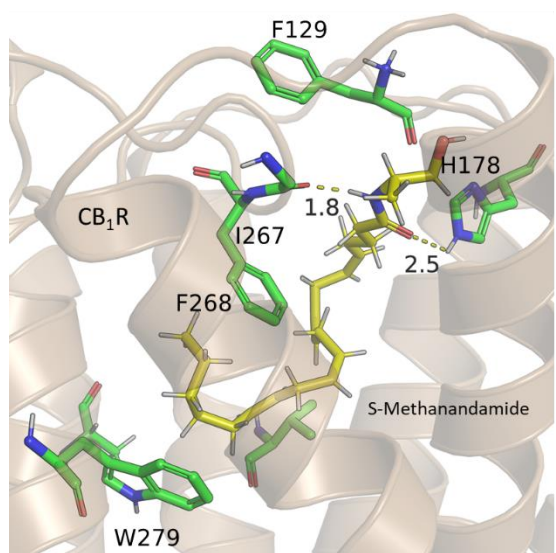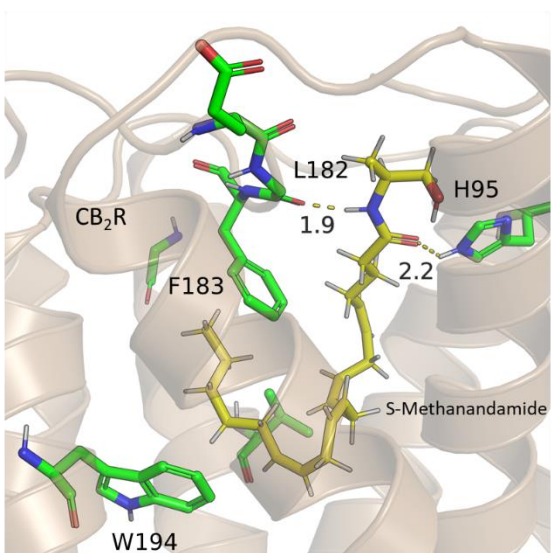

**Figure S13.** Binding modes of the ligand (S)-Methanandamide with both the CB<sub>1</sub> and CB<sub>2</sub> receptors.

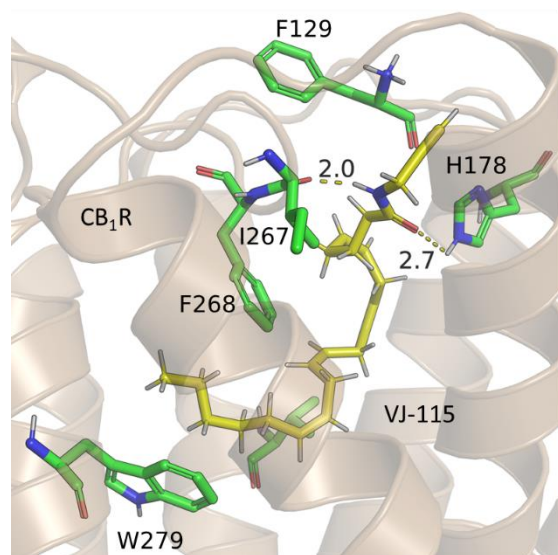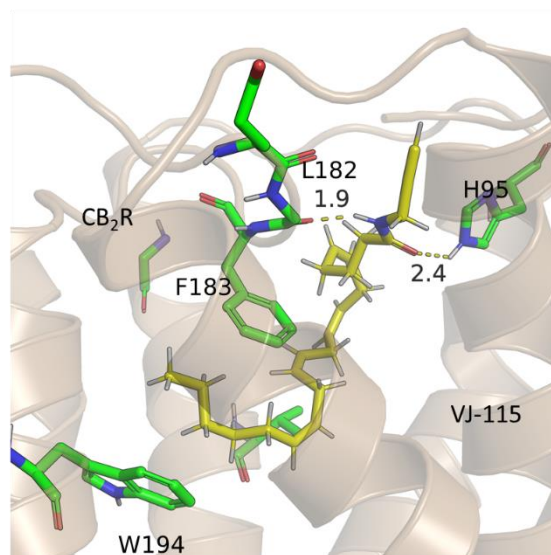

**Figure S14.** Binding modes of the ligand VJ-115 with both the CB<sub>1</sub> and CB<sub>2</sub> receptors.

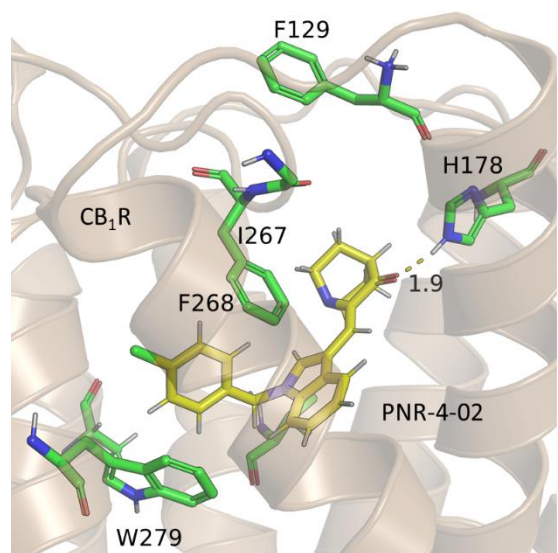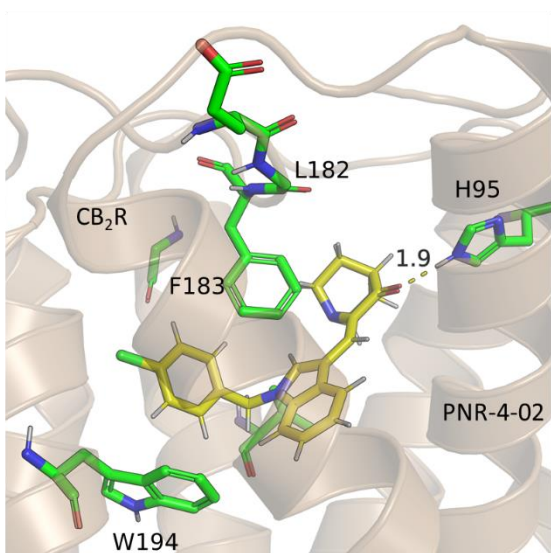

**Figure S15.** Binding modes of the ligand PNR-4-02 with both the CB<sub>1</sub> and CB<sub>2</sub> receptors.



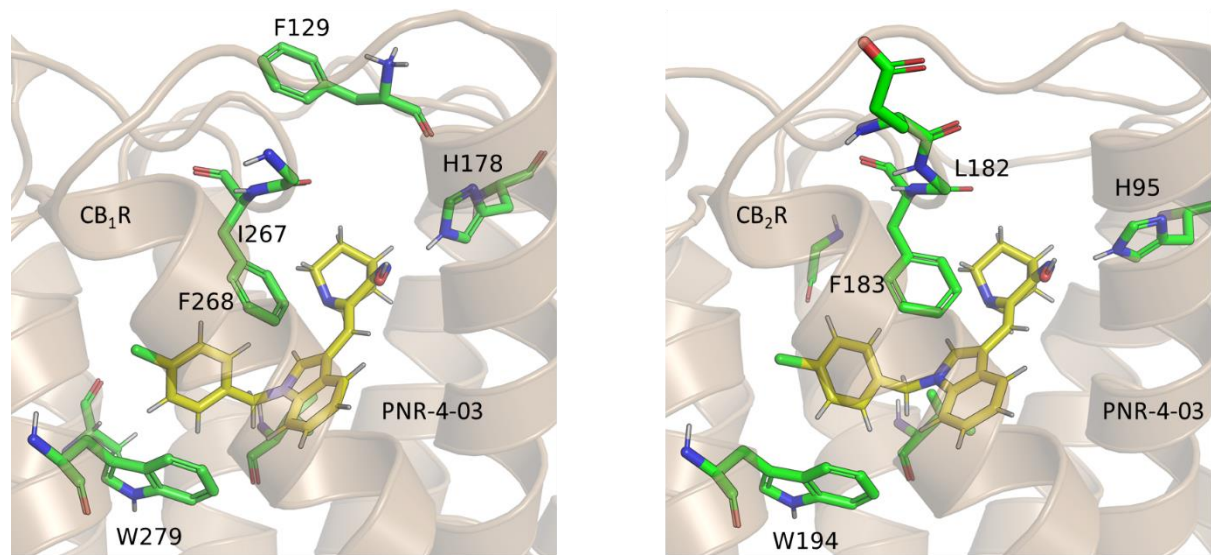

**Figure S16.** Binding modes of the ligand PNR-4-03 with both the CB<sub>1</sub> and CB<sub>2</sub> receptors.

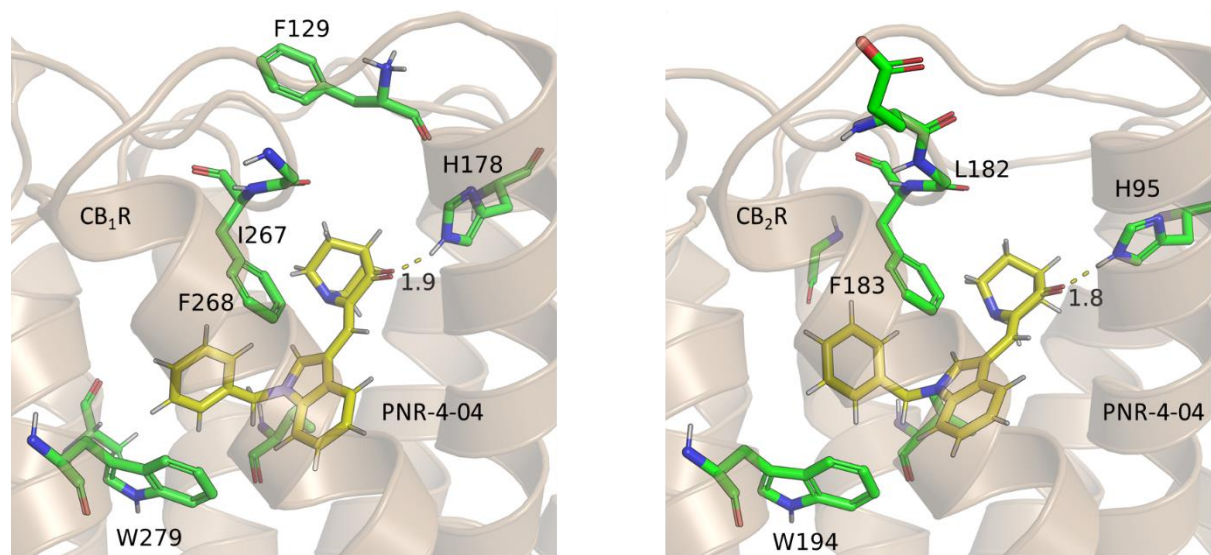

**Figure S17.** Binding modes of the ligand PNR-4-04 with both the CB<sub>1</sub> and CB<sub>2</sub> receptors.

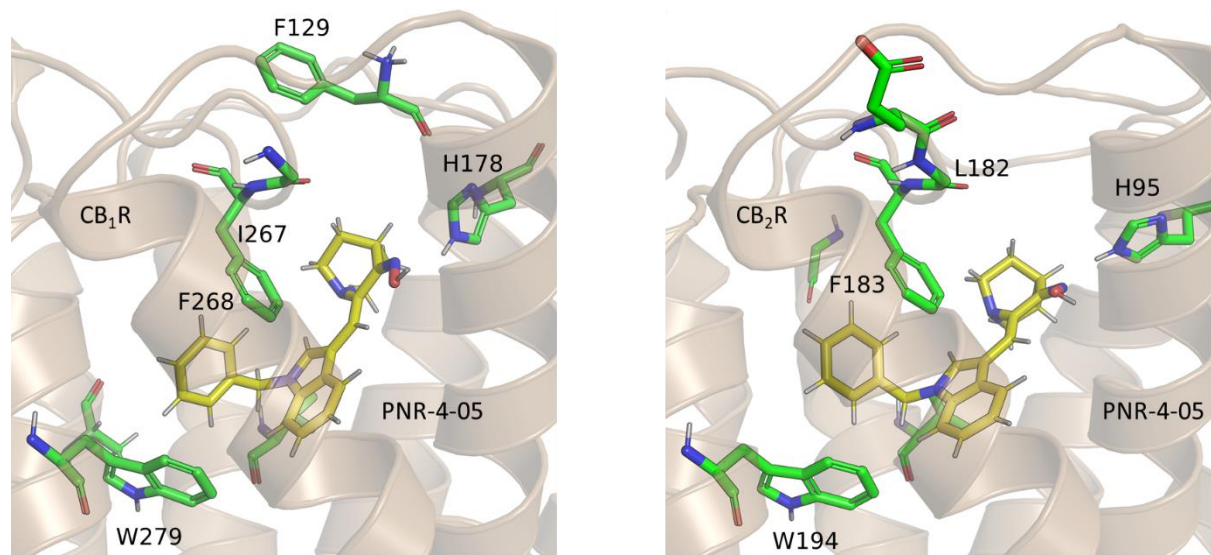

**Figure S18.** Binding modes of the ligand PNR-4-05 with both the CB<sub>1</sub> and CB<sub>2</sub> receptors.

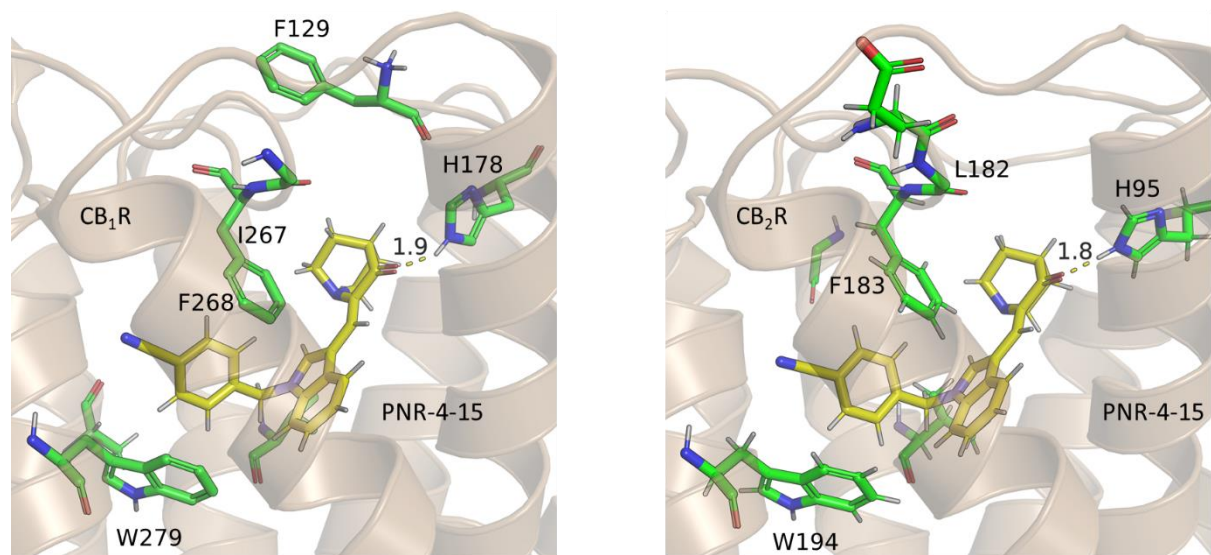

**Figure S19.** Binding modes of the ligand PNR-4-15 with both the CB<sub>1</sub> and CB<sub>2</sub> receptors.

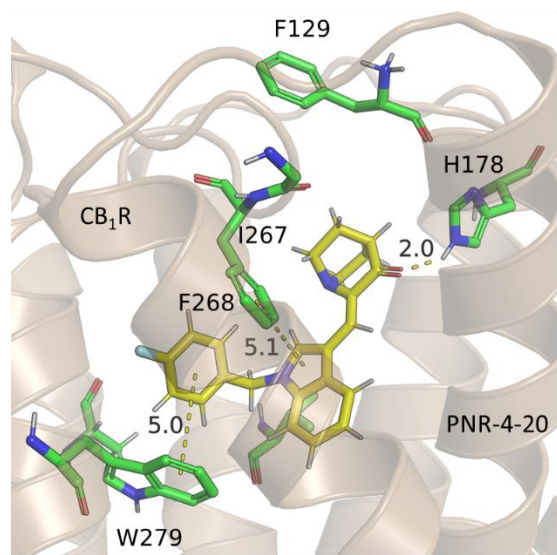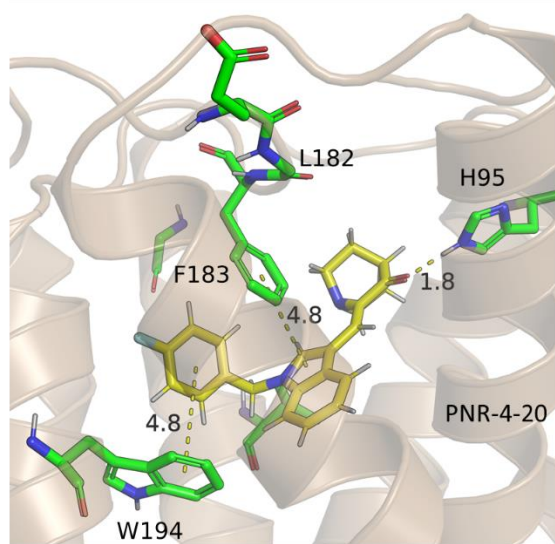

**Figure S20.** Binding modes of the ligand PNR-4-20 with both the CB<sub>1</sub> and CB<sub>2</sub> receptors.

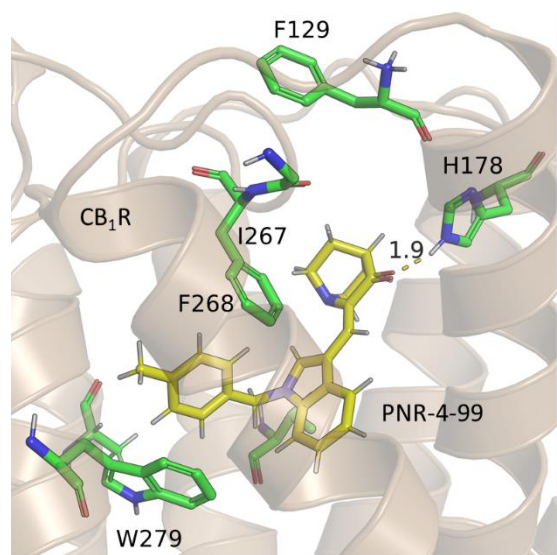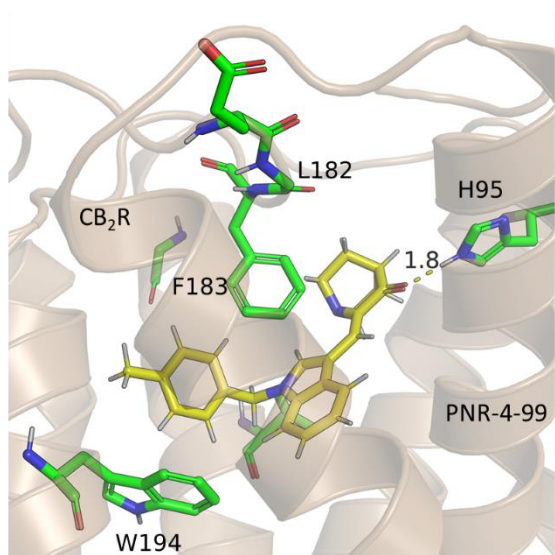

**Figure S21.** Binding modes of the ligand PNR-4-99 with both the CB<sub>1</sub> and CB<sub>2</sub> receptors.

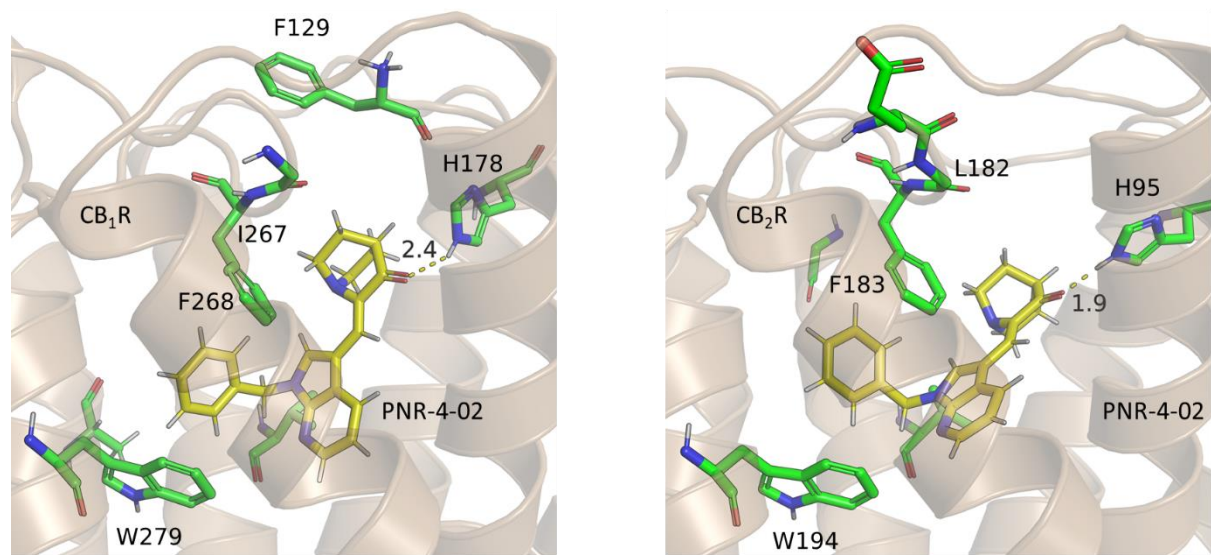

**Figure S22.** Binding modes of the ligand PNR-9-33 with both the CB<sub>1</sub> and CB<sub>2</sub> receptors.
